# Supplementary material for: The educational development of the Chagga tribe
Source: Royal Society of Chemistry journal article supplement (doi:10.1039/b909708b), 1954-01-01
Supplement: b909708b.pdf [file b909708b.pdf]

Electronic Supplementary Information

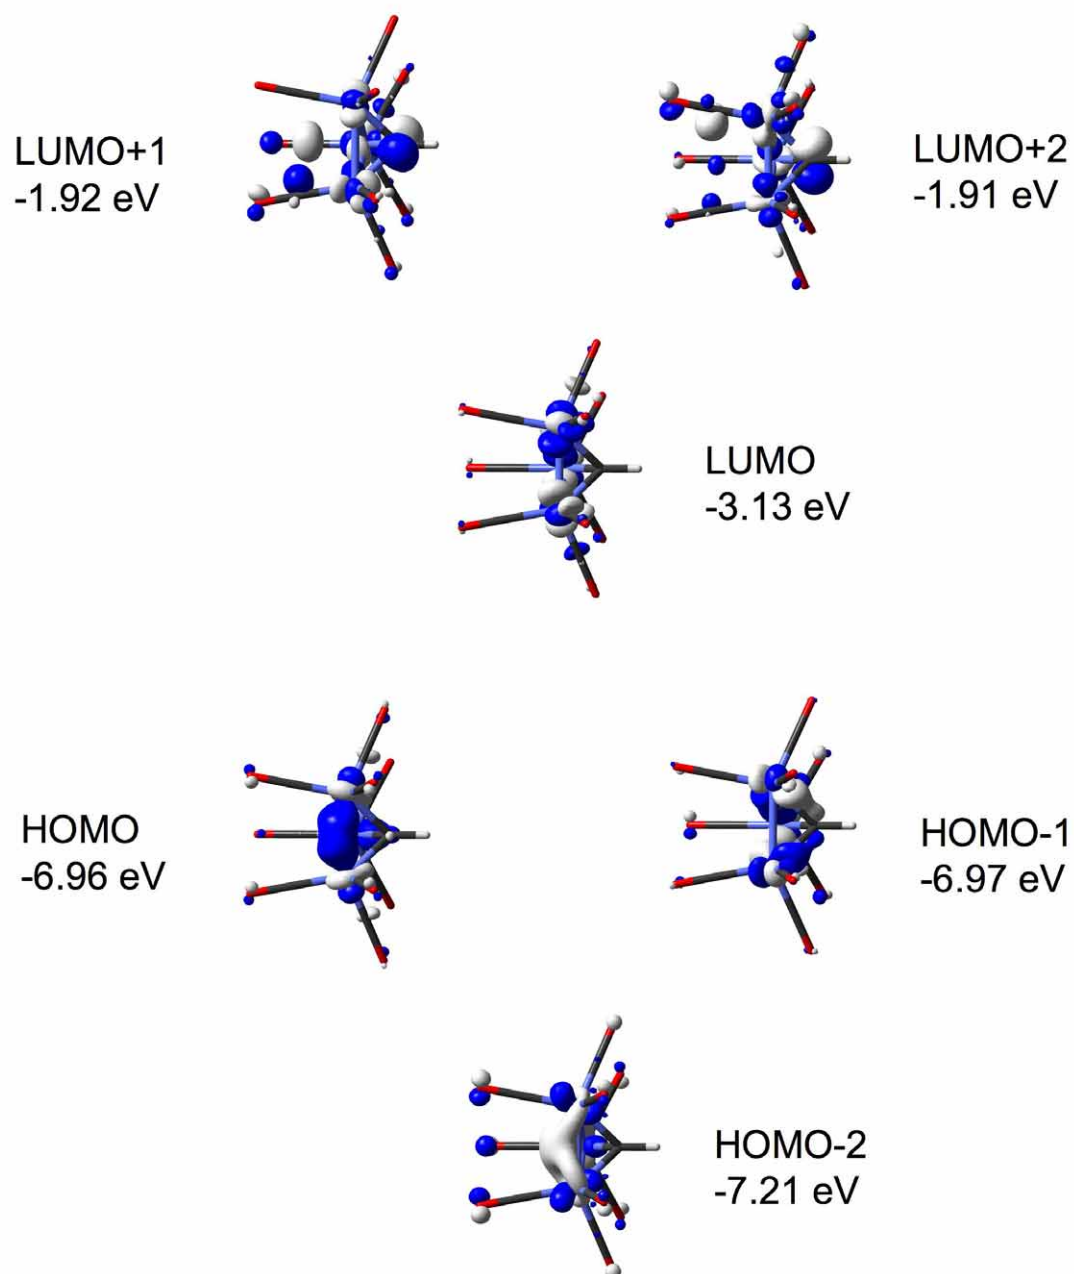

Figure S1. Plots of selected frontier orbitals and energies calculated from  $\text{Co}_3(\mu_3\text{-CH})(\text{CO})_9$ .

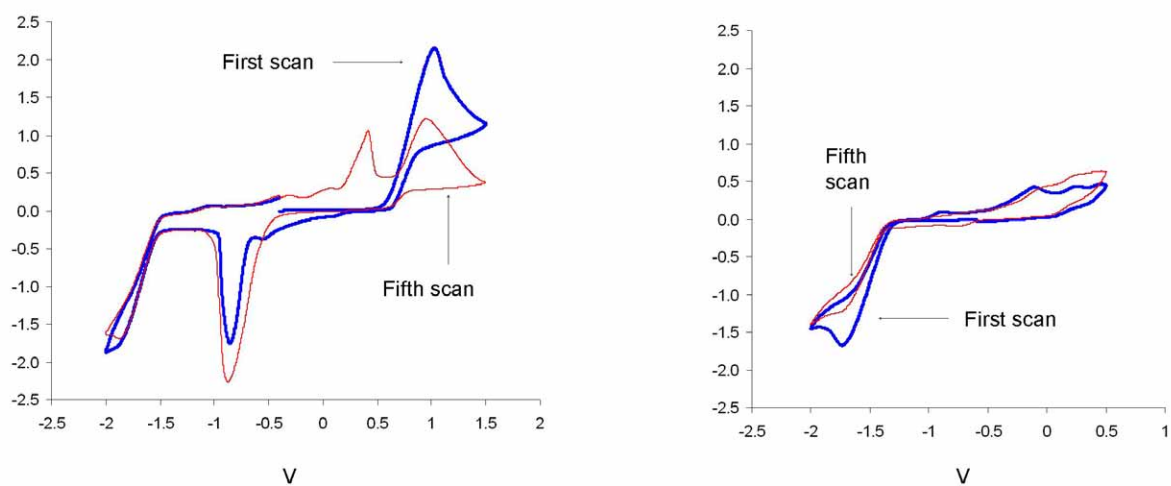

Figure S2. CV traces for **1**. Starting from initial oxidation (left) and initial reduction (right). First scan in blue and fifth cycle scan in red.

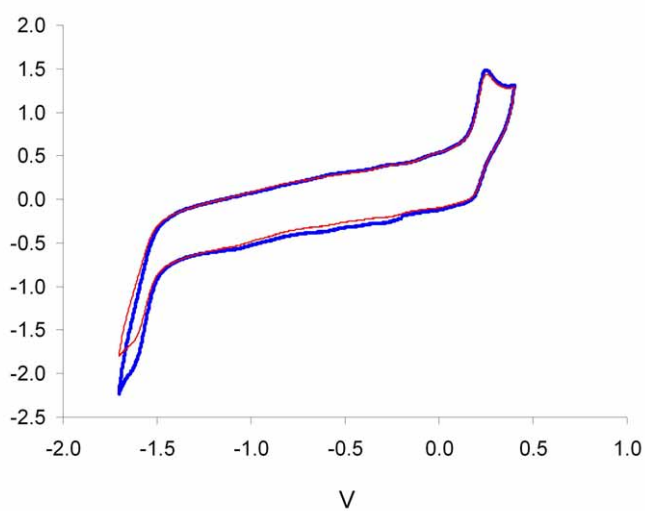

Figure S3. CV traces for **6**. Initial (blue) and fifth cycle (red) scans.

Table S1. Orbital numbers, energies and % composition for  $\text{Co}_3(\mu_3\text{-CH})(\text{CO})_9$ .

| MO  | eV   | Co <sub>3</sub> | CO | C  | H  |   |
|-----|------|-----------------|----|----|----|---|
| 116 | L+8  | -1.14           | 23 | 77 | 0  | 0 |
| 115 | L+7  | -1.14           | 23 | 77 | 0  | 0 |
| 114 | L+6  | -1.37           | 30 | 64 | 3  | 2 |
| 113 | L+5  | -1.39           | 15 | 85 | 0  | 0 |
| 112 | L+4  | -1.40           | 15 | 85 | 0  | 0 |
| 111 | L+3  | -1.77           | 20 | 79 | 1  | 0 |
| 110 | L+2  | -1.91           | 45 | 38 | 17 | 0 |
| 109 | L+1  | -1.92           | 45 | 38 | 17 | 0 |
| 108 | LUMO | -3.13           | 74 | 26 | 0  | 0 |
| 107 | HOMO | -6.96           | 80 | 17 | 3  | 0 |
| 106 | H-1  | -6.97           | 79 | 17 | 3  | 0 |
| 105 | H-2  | -7.21           | 71 | 30 | -1 | 0 |
| 104 | H-3  | -7.48           | 64 | 23 | 6  | 7 |
| 103 | H-4  | -7.49           | 63 | 22 | 15 | 0 |
| 102 | H-5  | -7.50           | 63 | 22 | 15 | 0 |
| 101 | H-6  | -8.06           | 82 | 18 | 0  | 0 |
| 100 | H-7  | -8.07           | 82 | 18 | 0  | 0 |
| 99  | H-8  | -8.15           | 84 | 16 | 0  | 0 |
| 98  | H-9  | -8.40           | 81 | 19 | 0  | 0 |
| 97  | H-10 | -8.41           | 81 | 19 | 0  | 0 |

Table S2. Orbital numbers, energies and % composition for **1-H**.

| MO  | eV   | CH <sub>2</sub> | S <sub>3</sub> | Co <sub>3</sub> | CO | C  | H  |   |
|-----|------|-----------------|----------------|-----------------|----|----|----|---|
| 131 | L+8  | -0.38           | 0              | 1               | 24 | 73 | 1  | 0 |
| 130 | L+7  | -0.38           | 0              | 1               | 24 | 73 | 1  | 0 |
| 129 | L+6  | -0.53           | 0              | 0               | 31 | 65 | 3  | 2 |
| 128 | L+5  | -1.07           | 3              | 2               | 36 | 59 | 0  | 0 |
| 127 | L+4  | -1.14           | 23             | 57              | 12 | 7  | 1  | 0 |
| 126 | L+3  | -1.14           | 23             | 57              | 12 | 7  | 1  | 0 |
| 125 | L+2  | -1.45           | 4              | 7               | 49 | 27 | 13 | 0 |
| 124 | L+1  | -1.45           | 4              | 6               | 49 | 27 | 13 | 0 |
| 123 | LUMO | -1.95           | 1              | 3               | 75 | 20 | 0  | 0 |
| 122 | HOMO | -5.89           | 2              | 2               | 84 | 11 | 1  | 0 |
| 121 | H-1  | -5.89           | 2              | 2               | 84 | 11 | 1  | 0 |
| 120 | H-2  | -5.96           | 2              | 2               | 78 | 20 | -1 | 0 |
| 119 | H-3  | -6.25           | 2              | 7               | 64 | 18 | 4  | 6 |
| 118 | H-4  | -6.47           | 1              | 14              | 64 | 15 | 6  | 0 |
| 117 | H-5  | -6.48           | 1              | 14              | 64 | 15 | 6  | 0 |
| 116 | H-6  | -6.75           | 3              | 3               | 83 | 8  | 4  | 0 |
| 115 | H-7  | -6.75           | 3              | 3               | 83 | 8  | 4  | 0 |
| 114 | H-8  | -6.88           | 2              | 1               | 86 | 11 | 0  | 0 |
| 113 | H-9  | -7.25           | 0              | 0               | 78 | 21 | 0  | 0 |
| 112 | H-10 | -7.26           | 0              | 0               | 78 | 21 | 0  | 0 |

Table S3. Orbital numbers, energies and % composition for  $\{\text{Co}_3(\text{CO})_9\}_2(\mu\text{-C}_4)$ .

| MO  |      | eV    | CO <sub>a</sub> (1) | CO <sub>e</sub> (1) | Co <sub>3</sub> (1) | C(1) | C(2) | C(3) | C(4) | Co <sub>3</sub> (2) | CO <sub>e</sub> (2) | CO <sub>a</sub> (2) |
|-----|------|-------|---------------------|---------------------|---------------------|------|------|------|------|---------------------|---------------------|---------------------|
| 230 | L+10 | -1.47 | 2                   | 5                   | 3                   | 0    | 0    | 0    | 0    | 14                  | 45                  | 30                  |
| 229 | L+9  | -1.48 | 34                  | 50                  | 15                  | 0    | 0    | 0    | 0    | 0                   | 0                   | 0                   |
| 228 | L+8  | -1.49 | 35                  | 50                  | 15                  | 0    | 0    | 0    | 0    | 0                   | 0                   | 0                   |
| 227 | L+7  | -1.79 | 12                  | 11                  | 19                  | 6    | 2    | 1    | 7    | 20                  | 11                  | 12                  |
| 226 | L+6  | -1.80 | 12                  | 11                  | 19                  | 6    | 2    | 1    | 6    | 19                  | 11                  | 12                  |
| 225 | L+5  | -1.84 | 1                   | 5                   | 1                   | 0    | 0    | 0    | 1    | 18                  | 66                  | 8                   |
| 224 | L+4  | -1.85 | 8                   | 66                  | 18                  | 1    | 0    | 0    | 0    | 1                   | 5                   | 0                   |
| 223 | L+3  | -2.85 | 4                   | 5                   | 26                  | 8    | 8    | 8    | 7    | 25                  | 5                   | 4                   |
| 222 | L+2  | -2.86 | 4                   | 5                   | 26                  | 8    | 8    | 8    | 7    | 25                  | 5                   | 4                   |
| 221 | L+1  | -3.18 | 0                   | 0                   | 0                   | 0    | 0    | 0    | 0    | 75                  | 19                  | 6                   |
| 220 | LUMO | -3.23 | 6                   | 19                  | 75                  | 0    | 0    | 0    | 0    | 0                   | 0                   | 0                   |
| 219 | HOMO | -6.30 | 3                   | 4                   | 25                  | 5    | 13   | 13   | 5    | 25                  | 4                   | 3                   |
| 218 | H-1  | -6.31 | 3                   | 4                   | 25                  | 5    | 13   | 12   | 5    | 26                  | 4                   | 3                   |
| 217 | H-2  | -7.07 | 2                   | 4                   | 29                  | 1    | 0    | 0    | 0    | 52                  | 8                   | 4                   |
| 216 | H-3  | -7.08 | 1                   | 3                   | 23                  | 1    | 0    | 0    | 0    | 57                  | 8                   | 4                   |
| 215 | H-4  | -7.16 | 5                   | 8                   | 50                  | 0    | 1    | 1    | 0    | 27                  | 4                   | 3                   |
| 214 | H-5  | -7.18 | 5                   | 8                   | 56                  | 0    | 1    | 1    | 0    | 22                  | 3                   | 3                   |
| 213 | H-6  | -7.27 | 0                   | 0                   | 1                   | 0    | 0    | 0    | 0    | 69                  | 18                  | 12                  |
| 212 | H-7  | -7.30 | 12                  | 18                  | 69                  | 0    | 0    | 0    | 0    | 1                   | 0                   | 0                   |
| 211 | H-8  | -7.73 | 2                   | 5                   | 20                  | 1    | 1    | 1    | 4    | 49                  | 12                  | 4                   |
| 210 | H-9  | -7.82 | 4                   | 12                  | 49                  | 5    | 0    | 0    | 2    | 21                  | 5                   | 2                   |
| 209 | H-10 | -7.85 | 5                   | 4                   | 30                  | 7    | 2    | 3    | 7    | 32                  | 4                   | 5                   |

Table S4. Orbital numbers, energies and % composition for **6-H**.

| MO  |      | eV    | CH <sub>2</sub> (1) | S <sub>3</sub> (1) | Co <sub>3</sub> (1) | CO(1) | C(1) | C(2) | C(3) | C(4) | Co <sub>3</sub> (2) | CO(2) | S <sub>3</sub> (2) | CH <sub>2</sub> (2) |
|-----|------|-------|---------------------|--------------------|---------------------|-------|------|------|------|------|---------------------|-------|--------------------|---------------------|
| 260 | L+10 | -0.88 | 2                   | 2                  | 26                  | 41    | 0    | 0    | 0    | 0    | 10                  | 17    | 1                  | 1                   |
| 259 | L+9  | -0.93 | 6                   | 8                  | 13                  | 10    | 3    | 1    | 1    | 3    | 16                  | 11    | 18                 | 11                  |
| 258 | L+8  | -0.93 | 7                   | 9                  | 14                  | 11    | 3    | 1    | 1    | 3    | 16                  | 11    | 15                 | 10                  |
| 257 | L+7  | -0.96 | 12                  | 29                 | 7                   | 4     | 0    | 0    | 0    | 0    | 5                   | 4     | 29                 | 10                  |
| 256 | L+6  | -0.97 | 12                  | 29                 | 6                   | 4     | 0    | 0    | 0    | 0    | 5                   | 3     | 30                 | 11                  |
| 255 | L+5  | -1.00 | 7                   | 24                 | 12                  | 12    | 2    | 1    | 1    | 2    | 11                  | 11    | 13                 | 4                   |
| 254 | L+4  | -1.00 | 7                   | 23                 | 11                  | 11    | 2    | 1    | 1    | 2    | 11                  | 10    | 17                 | 5                   |
| 253 | L+3  | -1.76 | 0                   | 0                  | 9                   | 2     | 0    | 0    | 0    | 0    | 66                  | 18    | 3                  | 1                   |
| 252 | L+2  | -1.77 | 1                   | 2                  | 67                  | 18    | 0    | 0    | 0    | 0    | 9                   | 2     | 0                  | 0                   |
| 251 | L+1  | -2.00 | 1                   | 3                  | 28                  | 4     | 7    | 8    | 8    | 7    | 28                  | 4     | 3                  | 1                   |
| 250 | LUMO | -2.00 | 1                   | 3                  | 28                  | 4     | 7    | 8    | 8    | 7    | 28                  | 4     | 3                  | 1                   |
| 249 | HOMO | -5.32 | 0                   | 4                  | 29                  | 3     | 3    | 10   | 10   | 3    | 30                  | 3     | 4                  | 0                   |
| 248 | H-1  | -5.33 | 0                   | 4                  | 29                  | 3     | 3    | 10   | 10   | 3    | 30                  | 3     | 4                  | 0                   |
| 247 | H-2  | -5.69 | 1                   | 1                  | 43                  | 6     | 0    | 0    | 0    | 0    | 42                  | 6     | 1                  | 1                   |
| 246 | H-3  | -5.70 | 1                   | 1                  | 35                  | 5     | 0    | 0    | 0    | 0    | 50                  | 7     | 1                  | 1                   |
| 245 | H-4  | -5.73 | 0                   | 0                  | 4                   | 1     | 0    | 0    | 0    | 0    | 73                  | 19    | 2                  | 2                   |
| 244 | H-5  | -5.75 | 2                   | 2                  | 73                  | 19    | 0    | 0    | 0    | 0    | 4                   | 1     | 0                  | 0                   |
| 243 | H-6  | -5.80 | 1                   | 1                  | 39                  | 6     | 0    | 3    | 3    | 0    | 39                  | 6     | 1                  | 1                   |
| 242 | H-7  | -5.81 | 1                   | 1                  | 46                  | 7     | 0    | 3    | 2    | 0    | 31                  | 5     | 1                  | 1                   |
| 241 | H-8  | -6.21 | 1                   | 3                  | 29                  | 8     | 2    | 1    | 1    | 3    | 38                  | 10    | 4                  | 1                   |
| 240 | H-9  | -6.28 | 1                   | 4                  | 38                  | 10    | 4    | 0    | 0    | 3    | 29                  | 8     | 3                  | 1                   |
| 239 | H-10 | -6.40 | 1                   | 6                  | 37                  | 9     | 1    | 1    | 1    | 1    | 32                  | 7     | 5                  | 0                   |
